# Supplementary material
Source: PubMed Central journal article supplement (PMC6983755)
Supplement: Supp_Fig1.pdf [file Supp_Fig1.pdf]

## Supplementary Data

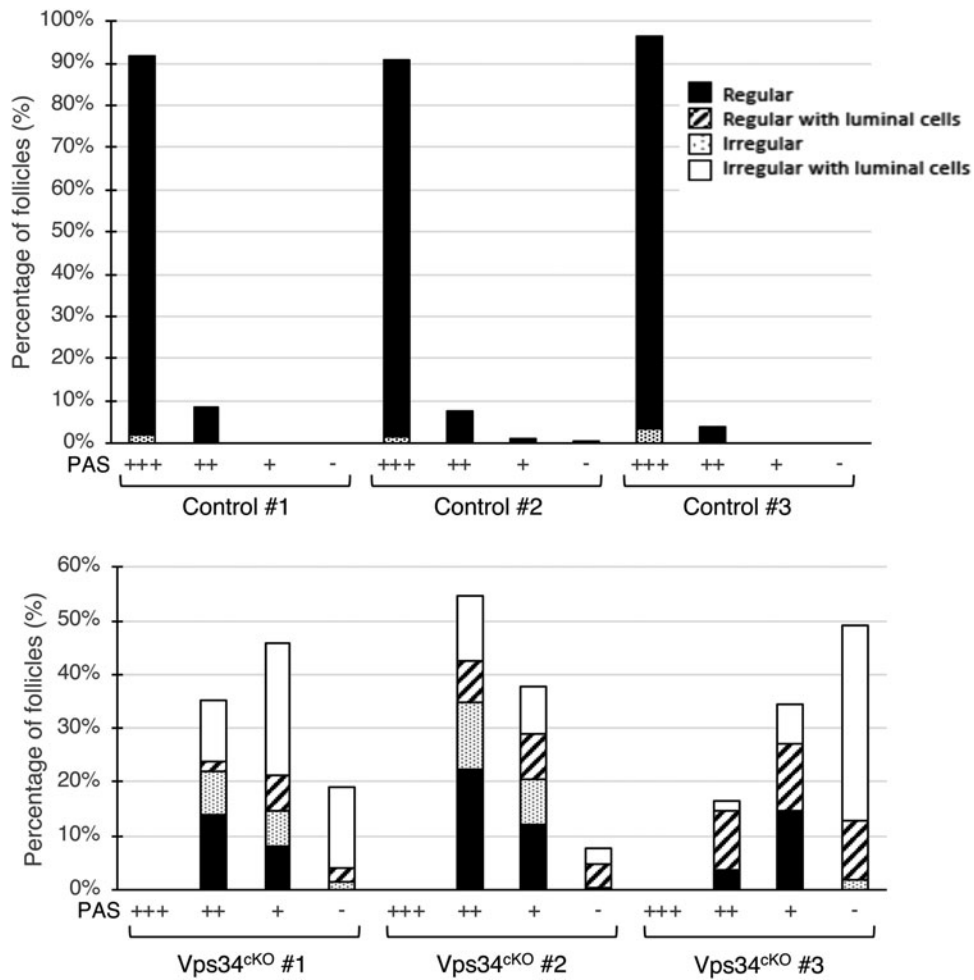

**SUPPLEMENTARY FIG. S1.** Histopathological evidence of colloid exhaustion: quantification. Follicles from three controls and three Vps34<sup>cKO</sup> sections stained with PAS were classified in four groups: regular follicle (black), regular follicle with luminal cells (dashed), irregular follicle (dotted), and irregular with luminal cells (white). In addition, each follicle group was assigned a PAS intensity: stronger than cartilage (PAS<sup>+++</sup>), similar to cartilage (PAS<sup>++</sup>), weaker than cartilage (PAS<sup>+</sup>), or no PAS staining (PAS<sup>-</sup>). In control, most follicles are regular and PAS<sup>++</sup>. In Vps34<sup>cKO</sup>, the four types of follicles can be found, and most follicles have low (PAS<sup>+</sup>) or no PAS staining. PAS, Periodic-Acid–Shiff.
