# Supplementary material
Source: PubMed Central journal article supplement (PMC6983755)
Supplement: Supp_Tables1-2.pdf [file Supp_Tables1-2.pdf]

SUPPLEMENTARY TABLE S1. ANTIBODIES AND USE

| <i>Antibody</i>                         | <i>Supplier</i>    | <i>Reference</i> | <i>Species</i> | <i>Dilution</i> | <i>Unmasking</i> | <i>Embedding</i>    |
|-----------------------------------------|--------------------|------------------|----------------|-----------------|------------------|---------------------|
| Act. Casp. 3                            | Cell Signalling    | 9661             | Rabbit         | 1/100           | +                | Paraffin            |
| $\beta$ -catenin                        | BD Biosciences     | 610154           | Mouse IgG1     | 1/1000          | +                | Paraffin            |
| E-cadherin                              | BD Biosciences     | 610182           | Mouse IgG2a    | 1/1000          | - or +           | Paraffin or gelatin |
| Ezrin                                   | Thermo Scientific  | MS-661-P1        | Mouse IgG1     | 1/400           | +                | Paraffin            |
| F4/80                                   | Cell Signalling    | 70076            | Rabbit         | 1/250           | +                | Paraffin            |
| I-Thyroglobulin                         | Gift: Ris Stalpers |                  | Mouse IgG1     | 1/100           | +                | Paraffin            |
| Ki67                                    | BD Biosciences     | 556003           | Mouse IgG1     | 1/250           | +                | Paraffin            |
| Laminin                                 | Sigma              | L9393            | Rabbit         | 1/100           | +                | Paraffin            |
| LAMP-1                                  | Hybridoma Bank     | 1D4B             | Rat (Mab)      | 1/100           | -                | Paraffin or gelatin |
| LAMP-2A                                 | Abcam              | Ab18528          | Rabbit         | 1/200           | +                | Paraffin            |
| LC3B                                    | Cell Signalling    | 3868             | Rabbit         | 1/100           | +                | Paraffin            |
| Na <sup>+</sup> /K <sup>+</sup> -ATPase | Hybridoma Bank     | $\alpha$ 6F      | Mouse IgG2a    | 1/400           | +                | Paraffin            |
| p62                                     | ARP                | 03-GP62C         | Guinea pig     | 1/400           | +                | Paraffin or gelatin |
| TOM20                                   | Cell Signalling    | D8T4N            | Rabbit         | 1/200           | +                | Paraffin            |
| Thyroglobulin                           | DAKO               | M0781            | Mouse IgG1     | 1/500           | +                | Paraffin            |
| TTF1                                    | Agilent            | M357501          | Mouse IgG1     | 1/200           | +                | Paraffin            |
| YFP                                     | Abcam              | Ab6673           | Goat           | 1/250           | +                | Paraffin or gelatin |
| ZO-1                                    | Invitrogen         | 61-7300          | Rabbit         | 1/75            | +                | Paraffin            |

SUPPLEMENTARY TABLE S2. PRIMERS

| <i>Gene</i>                     | <i>Forward primer (5' → 3')</i> | <i>Reverse primer (5' → 3')</i> |
|---------------------------------|---------------------------------|---------------------------------|
| <i>Ano1</i>                     | GAGGCCAGTAGCCATCAGAG            | CGTGAAGGAGATCACAAAGGC           |
| <i><math>\beta</math>-actin</i> | TCCTGAGCGCAAGTACTCTGT           | CTGATCCACATCTGCTGGAAG           |
| <i>Duox</i>                     | TCCAGAAGGCGCTGAACAG             | GCGACCAAAGTGGGTGATG             |
| <i>Duoxa2</i>                   | CGTTAACATTACACTCCGAGGAACA       | CAGAATGCCACCCACAGTGT            |
| <i>Gpx2</i>                     | GCTTCCCTTGCAACCAGTTC            | CTCCCCTTCTGGCCCTATGA            |
| <i>Nis</i>                      | AGCAGGCTTAGCTGTATCCC            | AGCCCCGTAGTAGAGATAGGAG          |
| <i>Nqo1</i>                     | CGTCATTCTCTGGCCGATTCA           | GGGGAAAAGAAAGCTGCGT             |
| <i>Nrf2</i>                     | GAATTCCTCCCAATTCAGCCG           | GCTGCCTCCAGAGAGCTATT            |
| <i>Rpl27</i>                    | GCCCTGGTGGCTGGAATTGACC          | AAACTTGACCTTGGCCTCCCGC          |
| <i>Slc26a4</i>                  | GCTCGCATTCCGGACTGTAA            | CAGCAAACCTGCTTTGGCAT            |
| <i>Slc26a7</i>                  | CTCAGTTCCTGTCCAACGG             | AGCGTGGAGACTCCTGTGTA            |
| <i>Tg</i>                       | TGGGACGTGAAAGGGGAATGGTGC        | GTGAGCTTTTGGAAATGGCAGGCGA       |
| <i>Tpo</i>                      | TGCCAACAGAAGCATGGGCAAC          | GCACAAAGTTCCCATGTCCAC           |
| <i>Tshr</i>                     | CTGCGGGGCAAAGAGTGTGC            | AGGGGAGCTCTGTCAAGGCA            |
| <i>Txnrd1</i>                   | TACTGCATCAGCAGTGATGATC          | CCATGTTCTTCCATGTGTTTCCAC        |
| <i>Vps34 ex20-21</i>            | CACACAGTATCCAGCACAGC            | TGAGACTGGACCCATGGCA             |
| <i>Vps34 ex21-22</i>            | TTGGAGTTGGAGACCGGCA             | TCCTTGTTTCCAGCTTCATCGGAG        |
| <i>Vps34 ex22-24</i>            | GATGGTGGAAAGGGATGGGTG           | CGCTCTCGTCGATCAGACTC            |
